# Supplementary material for: Development and validation of the Capacity to Treat Chronic Pain and Opioid Use Disorder (CAP-POD) questionnaire
Source: PubMed Central journal article supplement — Implement Res Pract. 2020 Sep 15;1:2633489520948859. doi: 10.1177/2633489520948859 (PMC9978608; doi:10.1177/2633489520948859), 2020-09-15
Supplement: Supplement_II.pdf [file Supplement_II.pdf]

Supplement II. **Capacity to Treat Chronic Pain and Opioid Use Disorder (CAP-POD)**  
**Questionnaire**

Using the scale provided, please rate the degree to which you agree or disagree with the following statements.

| <b>Strongly Disagree</b> | <b>Disagree</b> | <b>Somewhat Disagree</b> | <b>Neither Agree or Disagree</b> | <b>Somewhat Agree</b> | <b>Agree</b> | <b>Strongly Agree</b> |
|--------------------------|-----------------|--------------------------|----------------------------------|-----------------------|--------------|-----------------------|
| <b>1</b>                 | <b>2</b>        | <b>3</b>                 | <b>4</b>                         | <b>5</b>              | <b>6</b>     | <b>7</b>              |

1. I want to work with patients who have chronic pain.
2. I want to work with patients who have opioid use disorders.
3. I have the ability to assess risk for opioid use disorder in my chronic pain patients.
4. I assess risk for opioid use disorder in my chronic pain patients.
5. I trust research evidence related to chronic pain.
6. I trust research evidence related to opioid use disorder.
7. My patients can afford the recommended therapies for chronic pain.
8. My patients can afford the recommended treatments for opioid use disorder.
9. My team wants to work with patients with chronic pain.
10. My team wants to work with patients with opioid use disorders.

*Desire to Treat* = 1, 2, 9, 10; *Assessing Risk* = 3,4; *Trust in Evidence*= 5, 6; and *Patient Access* = 7, 8

**Scale Scoring**

Each scale score can be calculated by taking the mean of the items in the scale.
